# Supplementary material for: Copper intoxication inhibits aerobic nucleotide synthesis in Streptococcus pneumoniae
Source: Royal Society of Chemistry journal article supplement (doi:10.1039/c5mt00011d), 2015-01-01

## **Additional Methods used in Supplemental Data**

### **Anaerobic Growth in Anoxomat**

Plates were pre-incubated in an Anoxomat chamber (Advanced Instruments), which creates an anaerobic environment in roughly 5 minutes. Bacteria were grown to an O.D. of 0.1, serially diluted onto the pre-incubated plates, and incubated in the Anoxomat chamber under anaerobic conditions. CFUs were counted after 18 hours of growth.

### **Modeling**

The structure of NrdF from *E. coli* (pdb: 3N37) was aligned with a Phyre 2 model of NrdF from TIGR4 by using MacPyMOL.<sup>54</sup>

## Supplemental Figure Legends

### Supplemental Figure 1. Copper decreases nucleotide synthesis.

(A) Aerobic nucleotide synthesis genes increase during copper stress.  $p < .05$  compared to  $\Delta copA$  alone by using Student's  $t$ -test. (B) CFUs of  $\Delta nrdD$  mutant in aerobic, anaerobic GasPak jar, and Anoxomat chamber conditions. Aerobically grown bacteria at O.D. 0.3; bacteria at 620 nm were plated on blood agar plates in aerobic, anaerobic GasPak jar, or Anoxomat conditions  $n = 4$  (C) Additional transition metals do not change the growth of  $\Delta nrdD$  mutants in aerobic and anaerobic zone-of-growth inhibition assays. (D) Titration of hydroxyurea in the  $\Delta nrdD$  mutant. O.D. was measured 8 hours after inoculation. Error bars represent SD. \* Student's  $t$ -test indicates  $p < .01$  compared to wild-type TIGR4 treated with the same concentration of hydroxyurea (HU)  $n = 3$ . (E) Manganese increases replication of the  $\Delta nrdD$  mutants but cannot rescue them from hydroxyurea stress. Replication measured 8 hours after inoculation and normalized to that of the  $\Delta nrdD$  mutant without 1 mM of HU and/or 250  $\mu$ M of manganese. Error bars represent SEM  $n = 3$ . \* Student's  $t$ -test indicates  $p < .01$  compared to the  $\Delta nrdD$  mutant without metal stress; ND = Student's  $t$ -test indicates no difference.

### Supplemental Figure 2. Potential binding configuration for copper in NrdF

(A) The structural alignment of *E. coli* NrdF (pdb: 3N37) (cyan) to a Phyre model of TIGR4 *S. pneumoniae* NrdF (green) bound to manganese (magenta), as predicted by using PyMOL (Bennett-Lovsey et al., 2008; Boal et al., 2010). (B) Binding affinities of specific amino acids for various metals (Furia, 1972).

# Supplemental Figure 1

**A**

| TIGR4 Gene              | Real Time Fold Increase<br>$\Delta copA$ w/Cu vs.<br>$\Delta copA$ w/o Cu |
|-------------------------|---------------------------------------------------------------------------|
| SP_1179 ( <i>nrdH</i> ) | 2.33                                                                      |
| SP_1713 ( <i>nrdR</i> ) | 2.02                                                                      |

**B**

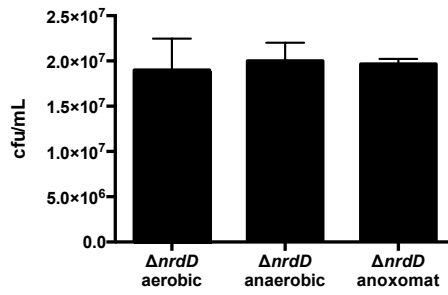

**C**

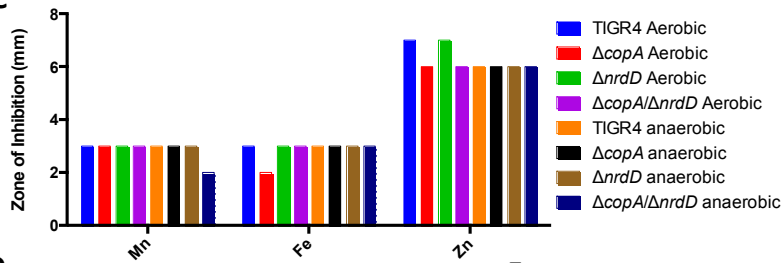

**D**

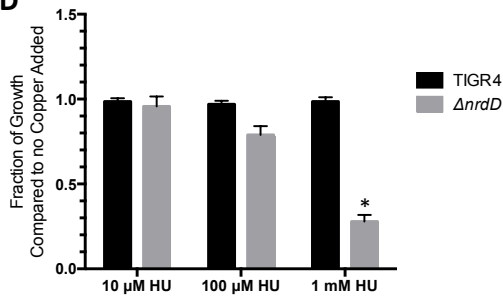

**E**

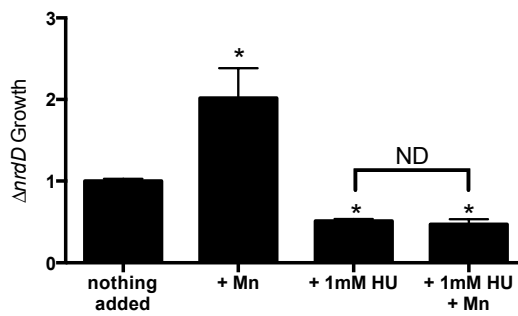

Supplemental Figure 2

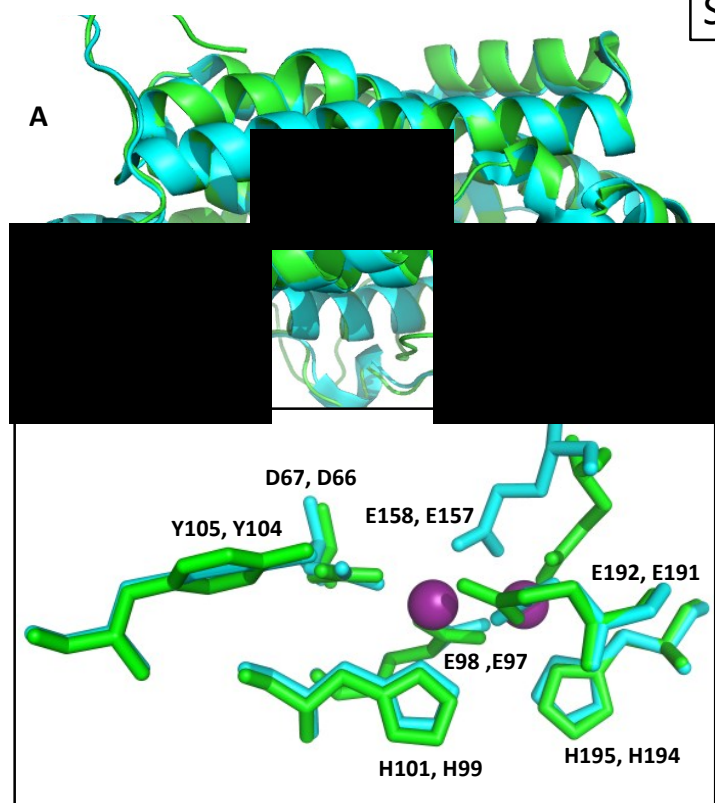

Supplement: c5mt00011d1.pdf [file c5mt00011d1.pdf]
